# Supplementary material
Source: PubMed Central journal article supplement (PMC5603305)
Supplement: NIHMS904579-supplement-2.pdf [file NIHMS904579-supplement-2.pdf]

## Supporting Information

# Bio-printing Cell-laden Matrigel/Agarose Constructs

Rong Fan<sup>1¶</sup>, Marine Piou<sup>1¶</sup>, Evan Darling<sup>2</sup>, Denis Cormier<sup>3</sup>, Jun Sun<sup>4\*</sup>, Jiandi Wan<sup>1\*</sup>

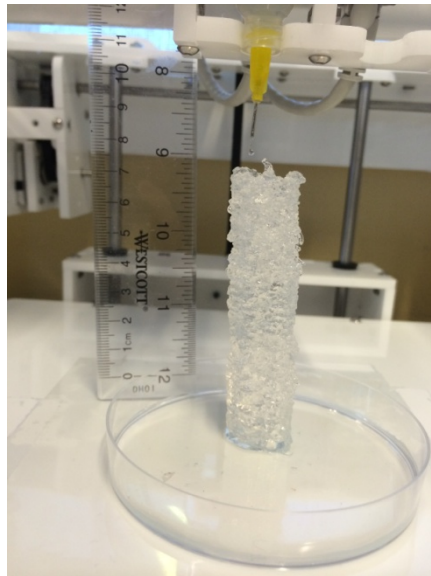

**FIGURE S1.** 3D printed tubular structure with a height of 8 cm using 2 wt% agarose.

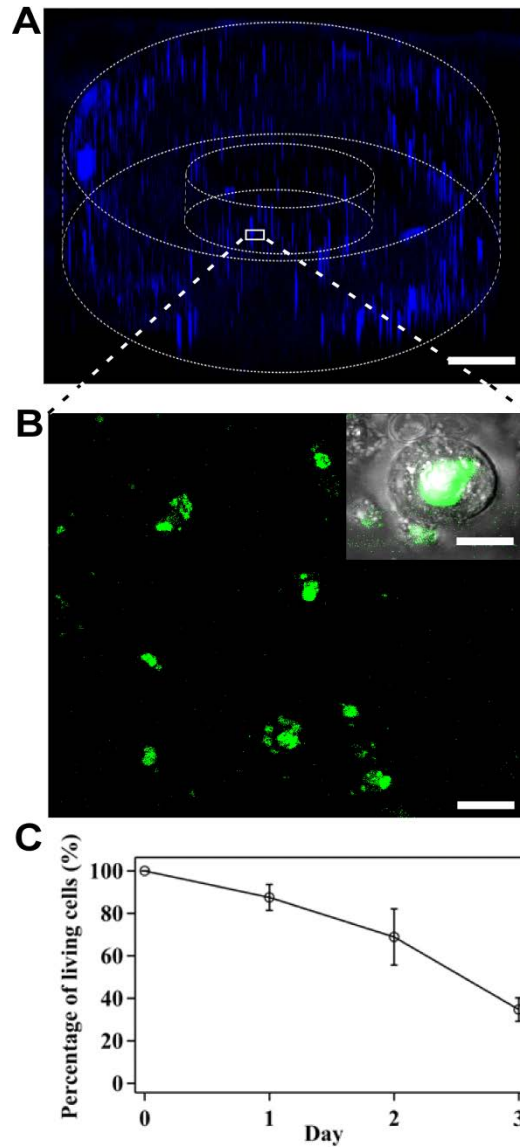

**FIGURE S2.** Cell growth in 3D printed agarose tubes. (A) A 3D constructed confocal image of a cell-containing agarose tube. Cells were stained with Nuc-blue after culturing for 3 days inside the tube. White dot-lines define the edges of the tube (scale bar = 2 mm). (B) A Fluorescent image of cells stained with Live/Dead assays in the agarose tube after culturing for 1 day (scale bar = 20  $\mu$ m). Inset: An image of a single cell in the agarose tube (scale bar = 5  $\mu$ m). (C) Cell viability in 3D printed tubular structures using 2 wt% agarose.

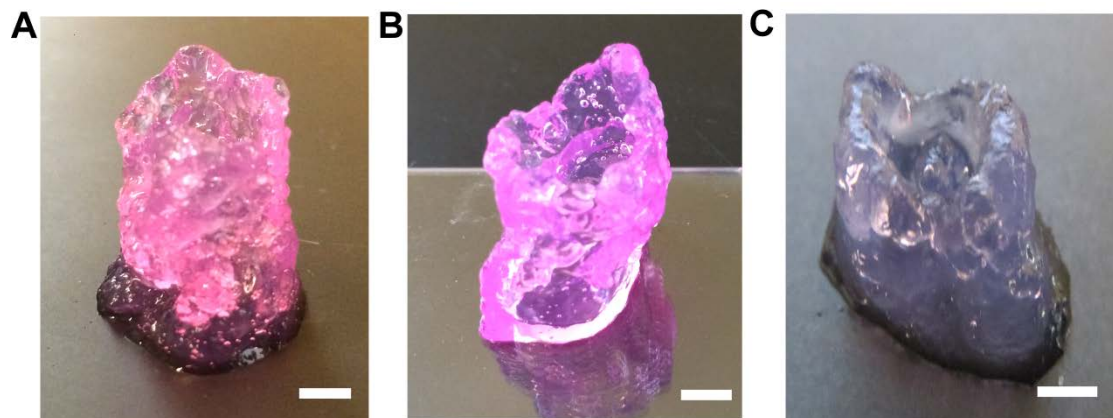

**FIGURE S3.** Images of tube printed using hybrid hydrogel composed of (A) 15%, (B) 30%, (C) 50% Matrigel and 2 wt% agarose (scale bar: 5 mm).
